# Supplementary material for: Literature-derived serum miRNA signatures associated with cognitive decline in Alzheimer’s disease: integrated analysis and machine learning-based diagnostic modeling
Source: Alzheimers Res Ther. 2026 Apr 20;18:135. doi: 10.1186/s13195-026-02048-x (PMC13227807; doi:10.1186/s13195-026-02048-x)
Supplement: Supplementary file 1 — Supplementary Material 1. [file 13195_2026_2048_MOESM1_ESM.xlsx]

## Sheet: Sheet1
Database	Search strategy
pubmed	((((((("Alzheimer Disease"[Mesh]) OR (Alzheimer's disease)) OR (AD)) OR (Alzheimer dementia)) OR (senile dementia)) AND(((((("MicroRNAs"[Mesh]) OR (miRNAs)) OR (miRNA)) OR (microRNA)) OR (microRNAs))) AND ((((((((("Mental Status and Dementia Tests"[Mesh]) OR (MoCA)) OR (Montreal Cognitive Assessment)) OR (MMSE)) OR (Mini Mental State Examination)) OR (ADAS)) OR (Alzheimer Disease Assessment Scale…
embase	#1 'alzheimer disease'/exp OR 'alzheimer disease' OR (alzheimer AND ('disease'/exp OR disease))
	#2 'microrna'/exp OR microrna OR mirnas OR mirna OR micrornas
	#3 ((((('dementia assessment'/exp OR moca OR montreal) AND cognitive AND assessment OR mirna OR mmse OR mini) AND mental AND state AND examination OR adas OR alzheimer) AND disease AND assessment AND scale OR 'adas cog' OR alzheimer) AND disease AND assessment AND 'scale cognitive' AND subscale OR cognitive) AND function OR cognition) AND assessment
	#4 #1 AND #2 AND #3
	#5 #1 AND #2 AND #3 AND [2014-2025]/py
web of science	#1 ((((TS=(Alzheimer Disease)) OR TS=(Alzheimer's disease)) OR TS=(AD)) OR TS=(Alzheimer dementia)) OR TS=(senile dementia)
	#2 ((((TS=(microRNAs)) OR TS=(miRNAs)) OR TS=(miRNA)) OR TS=(microRNA)
	#3 (((((((TS=(Mental Status and Dementia Tests)) AND TS=(MoCA)) AND TS=(Montreal Cognitive Assessment)) AND TS=(MMSE)) AND TS=(Mini Mental State Examination)) AND TS=(ADAS)) AND TS=(Alzheimer Disease Assessment Scale)) AND TS=(ADAS-Cog)) AND TS=(Alzheimer's Disease Assessment Scale Cognitive Subscale)
	#4 #1 AND #2 AND #3
	出版年份（Publication Year）：2014–2025
Cochrane Library	("Alzheimer's disease" OR AD OR "Alzheimer dementia" OR "senile dementia") AND (MicroRNAs OR microRNA OR miRNAs OR miRNA) AND ("Mental Status and Dementia Tests" OR MoCA OR "Montreal Cognitive Assessment" OR MMSE OR "Mini Mental State Examination" OR ADAS OR "Alzheimer Disease Assessment Scale" OR "Alzheimer's Disease Assessment Scale" OR ADAS-Cog)
	出版年份（Publication Year）：2014–2025
sinomed	检索条件：("阿尔茨海默病"[全部字段] OR "阿尔茨海默症"[全部字段] OR "老年痴呆"[全部字段] OR "老年性痴呆"[全部字段]) AND ("认知障碍"[全部字段] OR "轻度认知障碍"[全部字段] OR "轻度认知功能障碍"[全部字段] OR "轻度认知功能损害"[全部字段] OR "认知功能障碍"[全部字段] OR "认知损伤"[全部字段] OR "认知减退"[全部字段] OR "认知下降"[全部字段]) AND ("微小 RNA"[全部字段] OR "微 RNA"[全部字段] OR "miRNA"[全部字段] OR "微小核糖核酸"[全部字段] OR "microRNA"[全部字段]) AND ("认知功能"[全部字段] OR "认知评估"[全部字段] OR "MoCA"[全部字段] OR "蒙特利尔认知评估量表"[全部字段] OR "MMSE"[全部字段] OR…
	限定条件：2014-2025;
CNKI	(全文：阿尔茨海默病 + 阿尔茨海默症 + 老年痴呆 + 老年性痴呆 (精确)) AND(全文：微小 RNA + 微 RNA + miRNA + 微小核糖核酸 + microRNA (精确))AND (全文: MoCA + 蒙特利尔认知评估量表 + MMSE + 简易智力状态检查表 + 简易精神状态检查量表 + ADAS-Cog + ADAS + 阿尔茨海默病评定量表 + 阿尔茨海默病评定量表 - 认知分量表 (精确))
	出版年份（Publication Year）：2014–2025
Wanfang	(全部:(阿尔茨海默病 OR 阿尔茨海默症 OR 老年痴呆 OR 老年性痴呆) and 全部:(微小RNA OR 微RNA OR miRNA OR 微小核糖核酸 OR microRNA) and 全部:(MoCA OR 蒙特利尔认知评估量表 OR MMSE OR 简易智力状态检查表 OR 简易精神状态检查量表 OR ADAS\-Cog OR ADAS OR 阿尔茨海默病评定量表 OR 阿尔茨海默病评定)) and 发表时间:2014-2025
VIP	(((((任意字段=阿尔茨海默病 OR 任意字段=阿尔茨海默症) OR 任意字段=老年痴呆) OR 任意字段=老年性痴呆) AND ((((任意字段=微小RNA OR 任意字段=微RNA) OR 任意字段=miRNA) OR 任意字段=微小核糖核酸) OR 任意字段=microRNA)) AND ((((((((任意字段=MoCA OR 任意字段=蒙特利尔认知评估量表) OR 任意字段=MMSE) OR 任意字段=简易智力状态检查表) OR 任意字段=简易精神状态检查量表) OR (任意字段=ADAS AND ( NOT 任意字段=Cog))) OR 任意字段=ADAS) OR 任意字段=阿尔茨海默病评定量表) OR (任意字段=阿尔茨海默病评定量表 AND ( NOT 任意字段=认知分量表)))) AND (years:[2014 TO 2025])
