# Supplementary material for: Literature-derived serum miRNA signatures associated with cognitive decline in Alzheimer’s disease: integrated analysis and machine learning-based diagnostic modeling
Source: Alzheimers Res Ther. 2026 Apr 20;18:135. doi: 10.1186/s13195-026-02048-x (PMC13227807; doi:10.1186/s13195-026-02048-x)
Supplement: Supplementary file 2 — Supplementary Material 2. [file 13195_2026_2048_MOESM2_ESM.xlsx]

## Sheet: Sheet2
作者	Selection				Comparability	(miRNA)-Exposure
	1）Is the case definition adequate？	2）Representativeness of the cases	3）Selection of Controls	4) Definition of Controls	1）Comparability of cases and controls on the basis of the design or analysis	1）Ascertainment of exposure	2） Same method of ascertainment for cases and controls	3）Non-Response rate
Xiao JianTing, 2014	a) yes, with independent validation*	a) consecutive or obviously representative series of cases*	a) community controls*	a) no history of disease (endpoint)*	a) study controls for age*	a) secure record (eg surgical records)*	a) yes*	c) rate different and no designation
Tan, L.,2014	a) yes, with independent validation*	a) consecutive or obviously representative series of cases*	c) no description	a) no history of disease (endpoint)*	a) study controls for age*	a) secure record (eg surgical records)*	a) yes*	a) same rate for both groups*
Jia LiHua, 2016	a) yes, with independent validation*	a) consecutive or obviously representative series of cases*	a) community controls*	a) no history of disease (endpoint)*	a) study controls for age*	a) secure record (eg surgical records)*	a) yes*	a) same rate for both groups*
Qin Yang, 2019	a) yes, with independent validation*	a) consecutive or obviously representative series of cases*	a) community controls*	a) no history of disease (endpoint)*	a) study controls for age*	a) secure record (eg surgical records)*	a) yes*	a) same rate for both groups*
Cao F, 2020	a) yes, with independent validation*	a) consecutive or obviously representative series of cases*	c) no description	a) no history of disease (endpoint)*	a) study controls for age*	a) secure record (eg surgical records)*	a) yes*	a) same rate for both groups*
Zhao, Xiaohua, 2020	a) yes, with independent validation*	a) consecutive or obviously representative series of cases*	a) community controls*	a) no history of disease (endpoint)*	a) study controls for age*	a) secure record (eg surgical records)*	a) yes*	a) same rate for both groups*
Lin Ruidian, 2021	a) yes, with independent validation*	a) consecutive or obviously representative series of cases*	a) community controls*	a) no history of disease (endpoint)*	a) study controls for age*	a) secure record (eg surgical records)*	a) yes*	a) same rate for both groups*
Meng Kaitao, 2021	a) yes, with independent validation*	a) consecutive or obviously representative series of cases*	a) community controls*	a) no history of disease (endpoint)*	a) study controls for age*	a) secure record (eg surgical records)*	a) yes*	a) same rate for both groups*
Qiao Weidong, 2021	a) yes, with independent validation*	a) consecutive or obviously representative series of cases*	a) community controls*	a) no history of disease (endpoint)*	a) study controls for age*	a) secure record (eg surgical records)*	a) yes*	a) same rate for both groups*
Zhang Qun, 2021	a) yes, with independent validation*	a) consecutive or obviously representative series of cases*	a) community controls*	a) no history of disease (endpoint)*	a) study controls for age*	a) secure record (eg surgical records)*	a) yes*	a) same rate for both groups*
Zhou Yulei, 2021	a) yes, with independent validation*	a) consecutive or obviously representative series of cases*	a) community controls*	a) no history of disease (endpoint)*	a) study controls for age*	a) secure record (eg surgical records)*	a) yes*	a) same rate for both groups*
Dong LiHua, 2021	a) yes, with independent validation*	a) consecutive or obviously representative series of cases*	c) no description	a) no history of disease (endpoint)*	a) study controls for age*	a) secure record (eg surgical records)*	a) yes*	a) same rate for both groups*
Liu Qingling, 2021	a) yes, with independent validation*	a) consecutive or obviously representative series of cases*	a) community controls*	a) no history of disease (endpoint)*	a) study controls for age*	a) secure record (eg surgical records)*	a) yes*	a) same rate for both groups*
Liu, L., 2021	a) yes, with independent validation*	a) consecutive or obviously representative series of cases*	c) no description	a) no history of disease (endpoint)*	a) study controls for age*	a) secure record (eg surgical records)*	a) yes*	a) same rate for both groups*
Zhang, H., 2021	a) yes, with independent validation*	a) consecutive or obviously representative series of cases*	c) no description	a) no history of disease (endpoint)*	a) study controls for age*	a) secure record (eg surgical records)*	a) yes*	a) same rate for both groups*
Zhang, M., 2021	a) yes, with independent validation*	a) consecutive or obviously representative series of cases*	c) no description	a) no history of disease (endpoint)*	a) study controls for age*	a) secure record (eg surgical records)*	a) yes*	a) same rate for both groups*
Deng Tianling, 2022	a) yes, with independent validation*	a) consecutive or obviously representative series of cases*	a) community controls*	a) no history of disease (endpoint)*	a) study controls for age*	a) secure record (eg surgical records)*	a) yes*	a) same rate for both groups*
Wang Wei, 2022	a) yes, with independent validation*	a) consecutive or obviously representative series of cases*	a) community controls*	a) no history of disease (endpoint)*	a) study controls for age*	a) secure record (eg surgical records)*	a) yes*	a) same rate for both groups*
Zhou Weihua, 2022	a) yes, with independent validation*	a) consecutive or obviously representative series of cases*	a) community controls*	a) no history of disease (endpoint)*	a) study controls for age*	a) secure record (eg surgical records)*	a) yes*	a) same rate for both groups*
He Xia, 2023	a) yes, with independent validation*	a) consecutive or obviously representative series of cases*	a) community controls*	a) no history of disease (endpoint)*	a) study controls for age*	a) secure record (eg surgical records)*	a) yes*	a) same rate for both groups*
Wang, T., 2023	a) yes, with independent validation*	a) consecutive or obviously representative series of cases*	c) no description	a) no history of disease (endpoint)*	a) study controls for age*	a) secure record (eg surgical records)*	a) yes*	a) same rate for both groups*
He Lijie, 2024	a) yes, with independent validation*	a) consecutive or obviously representative series of cases*	a) community controls*	a) no history of disease (endpoint)*	a) study controls for age*	a) secure record (eg surgical records)*	a) yes*	a) same rate for both groups*
Wang Pengfei, 2024	a) yes, with independent validation*	a) consecutive or obviously representative series of cases*	a) community controls*	a) no history of disease (endpoint)*	a) study controls for age*	a) secure record (eg surgical records)*	a) yes*	c) rate different and no designation
