# Supplementary material for: Literature-derived serum miRNA signatures associated with cognitive decline in Alzheimer’s disease: integrated analysis and machine learning-based diagnostic modeling
Source: Alzheimers Res Ther. 2026 Apr 20;18:135. doi: 10.1186/s13195-026-02048-x (PMC13227807; doi:10.1186/s13195-026-02048-x)
Supplement: Supplementary file 4 — Supplementary Material 4. [file 13195_2026_2048_MOESM4_ESM.xlsx]

## Sheet: Sheet1
Positively correlated miRNAs	miRNA	target genes (Functional MTI)	gene number
	hsa-miR-133b	MCL1/BCL2L2/BCL2L2/MCL1/MCL1/BCL2L2/IGF1R/BCL2L2/MCL1/KCNH2/PITX3/FSCN1/FAIM/EGFR/FGFR1/FGFR1/CDK13/PTPRK/RB1CC1/CPNE3/PTPRK/CDK13/FGFR1/PRDM16/HCN4/FSCN1/STK3/EGFR/EGFR/STK3/CDC42/RHOA/GLI1/SP1/CDC42/FSCN1/TAGLN2/TAGLN2/CDC42/RHOA/BCL2L2/AKT1/FOXL2/FOXL2/MMP9/MMP9/CXCR4/CXCR4/BCL2L2/MCL1/IGF1R/MET/FOXL2/FOXL2/MMP9/MMP9/CXCR4/CXCR4/BCL2L2/MCL1/IGF1R/MET/EGFR/FAS/SIRT1/MCL1/BCL2L1/BCL2L2/BCL2L2/PK…	85
	hsa-miR-137	CDK6/KDM1A/KDM1A/CDK6/CDK6/CDC42/CTBP1/MITF/MITF/MITF/MITF/CDK6/CDK6/CDK6/CDC42/PTGS2/PTGS2/PTGS2/CDC42/PTGS2/PTGS2/PTGS2/CDC42/PTGS2/PTGS2/PTGS2/ESRRA/ESRRA/ZNF804A/YBX1/CDC42/CDK6/CSE1L/PXN/PXN/PXN/KDM1A/GLIPR1/MET/MET/YBX1/YBX1/CDK6/CDK6/FUNDC1/FUNDC1/BNIP3L/FMNL2/RORA/RORA/RORA/RORA/KIT/YBX1/AKT2/CDC42/CDK6/TGFB2/SERPINA3/MTDH/MTDH/AKT2/AKT2/KLF4/TBX3/KDM1A/TRIM13/TRIM13/TRIM13/TRIM13/COX2/MT…	110
	hsa-miR-148a-3p	DNMT3B/DNMT3B/RPS6KA5/RPS6KA5/RPS6KA5/HLA-G/DNMT1/DNMT1/DNMT1/TGIF2/NR1I2/CCKBR/DNMT1/DNMT1/IRS1/ACVR1/BCL2/BCL2/TMED7/TMED7/TMED7/TMED7/CDC25B/MMP7/CCKBR/WNT10B/CCKBR/CDKN1B/SERPINE1/ITGB8/VAV2/ITGA5/ROCK1/RUNX3/SMAD2/MMP7/DNMT1/MET/PBXIP1/PBXIP1/MAFB/ROCK1/DNMT1/ERRFI1/BCL2L11/BCL2L11/BCL2L11/DNMT1/ERRFI1/BCL2L11/BCL2L11/BCL2L11/ACVR1/ACVR1/S1PR1/S1PR1/DNMT1/DNMT1/PDIA3/S1PR1/MAP3K4/MAP3K9/WNT1…	96
	hsa-miR-193a-3p	MCL1/E2F6/PRAP1/MCL1/MCL1/MCL1/MCL1/MCL1/SLC7A5/ERBB2/PRAP1/MCL1/ERBB2/PRAP1/MCL1/TGFB2/RAB27B/RAB27B/CCND1/SELENON/PLAU/PTEN/E2F6/ALKBH5/ACTG2/CCND1/CCND1/LRRC1/PTEN/ZC3H12A/EGFR/BRAF/TRA/EGFR/BRAF/PAK3	36
	hsa-miR-27a-3p	SP1/SP3/SP4/MYT1/ZBTB10/PHB/FOXO1/FOXO1/MYT1/ZBTB10/FOXO1/HIPK2/THRB/SPRY2/WEE1/PHB/PHB/APC/APC/FBXW7/FBXW7/IGF1/WEE1/FBXW7/FBXW7/PHB/PHB/APC/APC/IGF1/PAX3/WEE1/FBXW7/FBXW7/PHB/PHB/APC/APC/IGF1/PAX3/FOXO1/WDR77/WDR77/WDR77/ABCA1/PDS5B/ABCA1/PDS5B/NFE2L2/EGFR/SP3/SP4/SP1/SEMA6A/EGFR/EGFR/SPRY2/MET/SEMA6A/SP1/CCND1/YWHAZ/SLC7A11/MAP2K4/MAP2K4/ZBTB10/ABCA1/ABCA1/HOXA10/LDLR/PSAP/GATA2/GATA2/APC/PIK3…	192
	hsa-miR-320a	TFRC/HSPB6/TFRC/MCL1/TFRC/TFRC/TFRC/TFRC/AQP1/AQP4/NPR1/NPR1/MAPK1/MCL1/ITGB3/GNAI1/ARF1/NRP1/NRP1/NRP1/BANP/IGF1R/PTEN/BMI1/BMI1/TRPC5/NFATC3/NFATC3/BANP/IGF1R/PTEN/BMI1/BMI1/TRPC5/NFATC3/NFATC3/PDCD4/RAB14/RAB14/PBX3/SUZ12/VDAC1/VDAC1/VDAC1/PBX3/FOXM1/KITLG/RUNX2/PBX3/MTDH/MTDH/VDAC1/YWHAZ/FOXM1/ITGB3/ITGB3/ITGB3/ITGB3/PBX3/ARPP19/ARPP19/VDAC1/MYC/HOXA10/HOXA10/PBX3/PIK3CA/XBP1/TGFBR2/IGF1R/AKT…	81
	hsa-miR-331-3p	ERBB2/FHIT/E2F1/DOHH/DOHH/PHLPP1/NRP2/ERBB2/HOTAIR/ERBB2/NRP2/ERBB2/HOTAIR/ERBB2/ING5/NRP2/ERBB2/SP1/GRIK3/MAP2K7/NRP2/SOCS1	22
	hsa-miR-340-5p	MET/SOX2/SOX2/SOX2/KRAS/MECP2/HNRNPA2B1/PTBP1/HNRNPA2B1/ROCK1/RHOA/ROCK1/RHOA/PUM1/PUM1/PUM1/PUM2/PUM2/SKP2/MITF/CDK6/CCND1/CCND2/STAT3/STAT3/FZD3/SOX2/LINC01234/VAV3/NET1/LBR/WIF1/DNMT3A/SCHLAP1/EZH2/DNMT3A/MITF/STAT3/IL6/IL1B/TGFA/PIK3C3/LINC01094/BSG/ATF1/PROX1/EMP2	47
	hsa-miR-511-3p	ZFPM2-AS1	1
	hsa-miR-342-3p	GEMIN4/BMP7/DNMT1/ID4/SREBF2/SREBF1/SREBF2/SREBF1/DNMT1/ANXA2/MTOR/MAP1LC3B/MAPK1/SOX6/BAG1/LINC00460/AGR2	17
Negatively correlated miRNAs	miRNA	target genes (Functional MTI)	gene number
	hsa-miR-24-3p	ACVR1B/DHFR/DHFR/CDKN2A/CDKN2A/ACVR1B/DHFR/HNF4A/HNF4A/HNF4A/HNF4A/HNF4A/TRIB3/MYC/MYC/E2F2/AURKB/BRCA1/POLD1/CDK4/CCNA2/FEN1/MAPK14/DND1/CDKN1B/TGFB1/FURIN/FAF1/FAF1/HNF4A/FAF1/FAF1/HNF4A/ZNF217/ST7L/ST7L/AURKB/BCL2L11/DEDD/TMED7/STX16/MLEC/BRCA1/CHEK1/CORO1A/E2F2/PCNA/CDK4/CCNA2/CDK1/FEN1/PTPN9/PTPN9/PTPRF/PTPRF/CDKN1B/PAK4/PAK4/SH3PXD2A/ARHGAP19/ARHGAP19/Furin/S100A8/S100A8/FURIN/MXI1/XIAP/NOS…	133
	hsa-miR-28-3p	HGF/EZR	2
	hsa-miR-98-5p	E2F2/E2F2/MYC/TUSC2/SOCS4/EZH2/IL13/EZH2/IL13/EZH2/IL13/CCNJ/HMGA2/SOCS4/CYP19A1/PGRMC1/CBL/CBL/CBL/HMGA2/HMGA2/HMGA2/HMGA2/E2F5/CYP19A1/CYP19A1/CASP3/IL6/CCL5/SNX6/EDN1/PBX3/PBX3/IGF1/ITGB3/ITGB3/ITGB3/ITGB3/ITGB3/ITGB3/ITGB3/ITGB3/ITGB3/EZH2/NRAS/CTNND1/HLF/IL6/C1GALT1/IGF2BP1/HMGA2/PPP1R15B/DSCR8/IGF1R	54
