# Supplementary material for: Literature-derived serum miRNA signatures associated with cognitive decline in Alzheimer’s disease: integrated analysis and machine learning-based diagnostic modeling
Source: Alzheimers Res Ther. 2026 Apr 20;18:135. doi: 10.1186/s13195-026-02048-x (PMC13227807; doi:10.1186/s13195-026-02048-x)
Supplement: Supplementary file 6 — Supplementary Material 6. [file 13195_2026_2048_MOESM6_ESM.xlsx]

## Sheet: Sheet1
Baseline: age	K_label	miRNAs	n_features_total	AUC_OOF	AUC_CI95_low	AUC_CI95_high	PR_AUC	Brier	SE_from_folds
	K0	(none)	1	0.806227	0.77695	0.834507	0.919491	0.20267	0.0167766
	K1	hsa-miR-211-5p	2	0.821478	0.794121	0.846722	0.934464	0.194469	0.0165054
	K2A	hsa-miR-211-5p;hsa-miR-128-1-5p	3	0.812469	0.782276	0.839888	0.920119	0.183526	0.0137103
	K2B	hsa-miR-211-5p;hsa-miR-128-3p	3	0.818088	0.788948	0.844771	0.927541	0.183859	0.0161952
	K3	hsa-miR-211-5p;hsa-miR-128-1-5p;hsa-miR-128-3p	4	0.823196	0.794561	0.849147	0.924825	0.179385	0.0134081
Baseline: age+sex	K_label	miRNAs	n_features_total	AUC_OOF	AUC_CI95_low	AUC_CI95_high	PR_AUC	Brier	SE_from_folds
	K0	(none)	2	0.815833	0.787892	0.842979	0.930063	0.176373	0.0163992
	K1	hsa-miR-211-5p	3	0.810272	0.781445	0.837319	0.929584	0.186096	0.0165602
	K2A	hsa-miR-211-5p;hsa-miR-128-1-5p	4	0.818771	0.790939	0.845398	0.927425	0.179042	0.0142702
	K2B	hsa-miR-211-5p;hsa-miR-128-3p	4	0.826249	0.798757	0.852603	0.935148	0.170588	0.0148593
	K3	hsa-miR-211-5p;hsa-miR-128-1-5p;hsa-miR-128-3p	5	0.836462	0.811069	0.862796	0.93461	0.170285	0.0134351
